# Supplementary material for: The roles of metal species supported on Fe3O4 aerogel for photoassisted 4-nitrophenol reduction and benzoic acid oxidation
Source: Royal Society of Chemistry journal article supplement (doi:10.1039/d1cy00077b), 2021-01-01
Supplement: d1cy00077b1.pdf [file d1cy00077b1.pdf]

## The roles of metal species supported on Fe<sub>3</sub>O<sub>4</sub> aerogel for photoassisted 4-nitrophenol reduction and benzoic acid oxidation

Chechia Hu<sup>\*\*ab</sup>, Yi-Chan Hung<sup>c</sup>, Pin-Yo Tseng<sup>c</sup>, Zhen-Jie Yang<sup>c</sup>, Yi-Feng Lin<sup>\*bc</sup>, Van-Huy  
Nguyen<sup>d</sup>

<sup>a</sup> Department of Chemical Engineering, National Taiwan University of Science and Technology, Daan Dist., Taipei City, 106 Taiwan

<sup>b</sup> R&D center for Membrane Technology and Research Center for Circular Economy, Chung Yuan Christian University, Chungli Dist., Taoyuan City, 320 Taiwan

<sup>c</sup> Department of Chemical Engineering, Chung Yuan Christian University, Chungli Dist., Taoyuan City, 320 Taiwan

<sup>d</sup> Institute of Research and Development, Duy Tan University, Da Nang, 550000 Vietnam

*\* To whom correspondence should be addressed:*

*E-mail:* [chechia@mail.ntust.edu.tw](mailto:chechia@mail.ntust.edu.tw)<sup>\*\*</sup>; [yflin@cycu.edu.tw](mailto:yflin@cycu.edu.tw)<sup>\*</sup>

*Tel:* 886-2-27376638 *Fax:* 886-2-27376644

**Corresponding Authors:**

Prof. Chechia Hu ([chechia@mail.ntust.edu.tw](mailto:chechia@mail.ntust.edu.tw))

Prof. Yi-Feng Lin ([yflin@cycu.edu.tw](mailto:yflin@cycu.edu.tw))

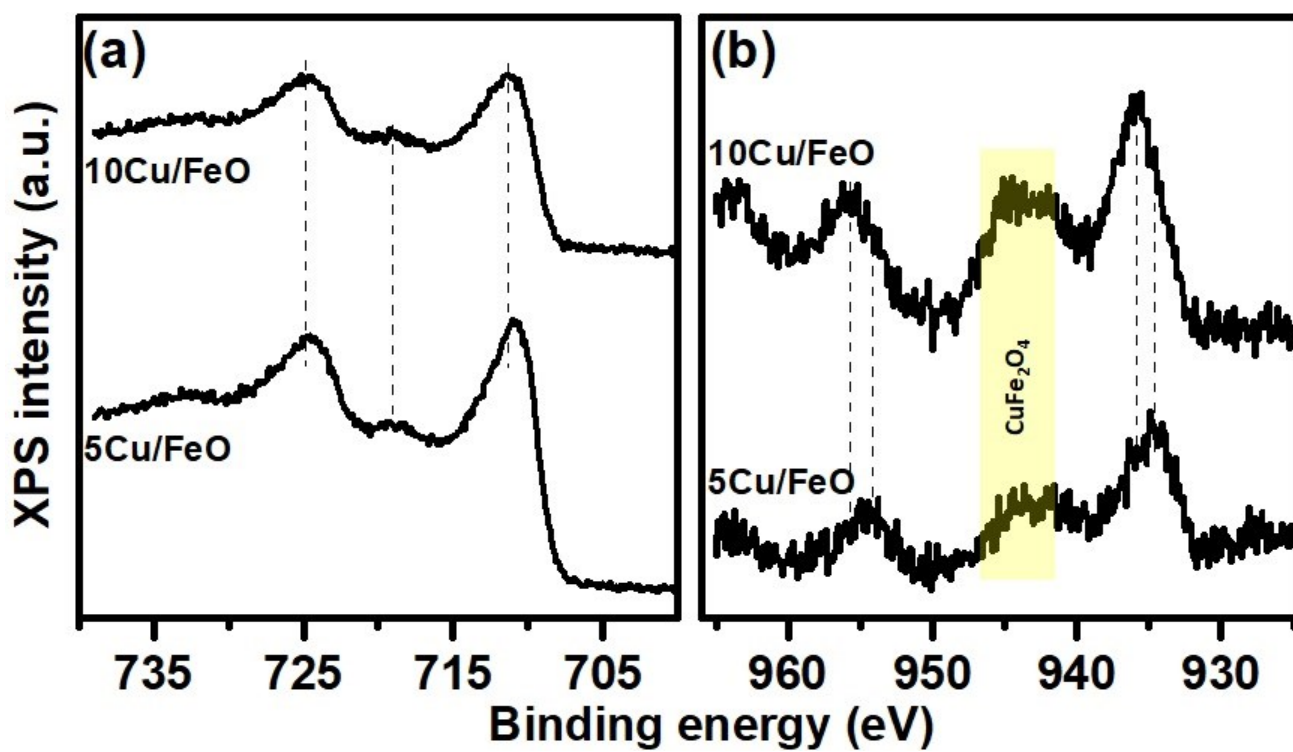

Figure S1 High-resolution (a) Fe 2*p* and (b) Cu 2*p* XPS profiles of 10Cu/FeO and 5Cu/FeO samples.

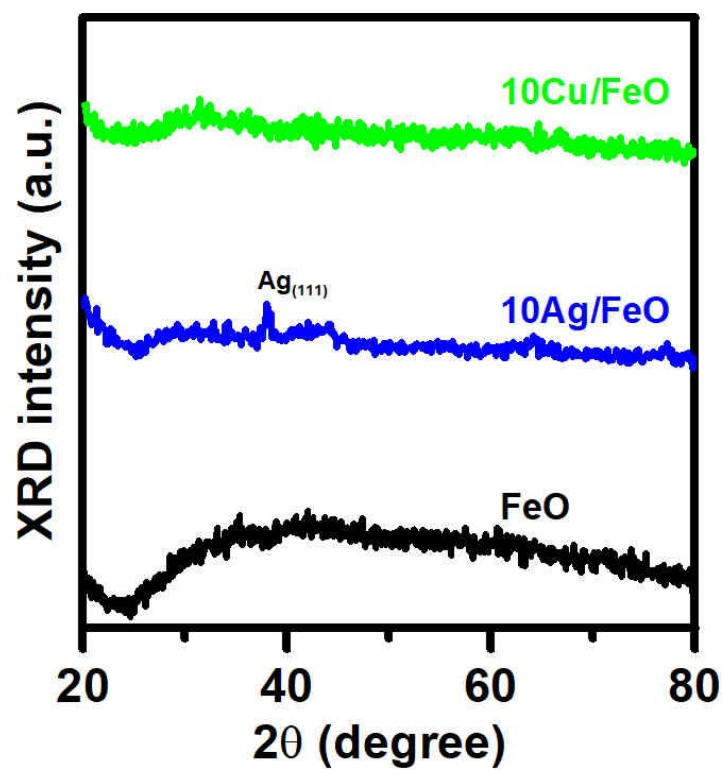

**Figure S2** XRD patterns of FeO, 10Cu/FeO, and 10Ag/FeO samples.

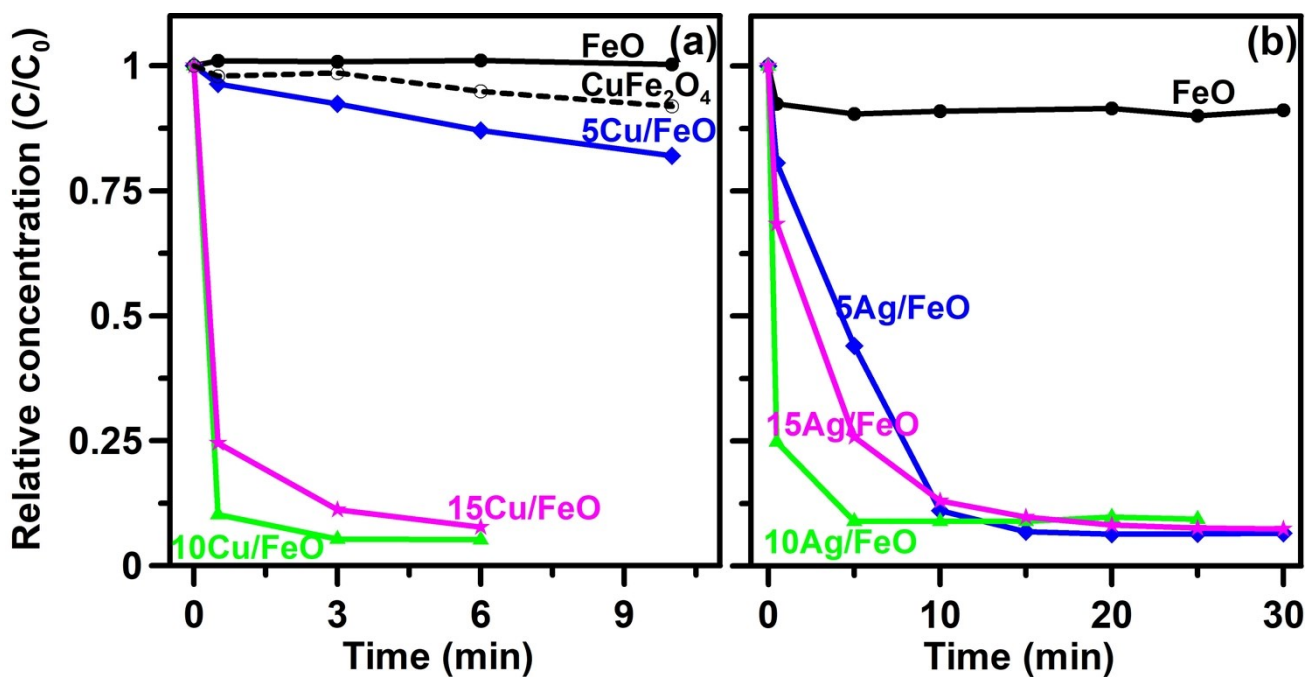

**Figure S3** Photoassisted reduction of 4-NP ( $2 \times 10^{-4}$  M, 50 mL) to 4-AP under simulated solar irradiation in the presence of  $NaBH_4$  (0.1 M, 10 mL) as the reducing agent using (a) 0.001 g of FeO, 5Cu/FeO, 10Cu/FeO, 15Cu/FeO, and  $CuFe_2O_4$ , and (b) 0.02 g of FeO, 5Ag/FeO, 10Ag/FeO, and 15Ag/FeO samples.

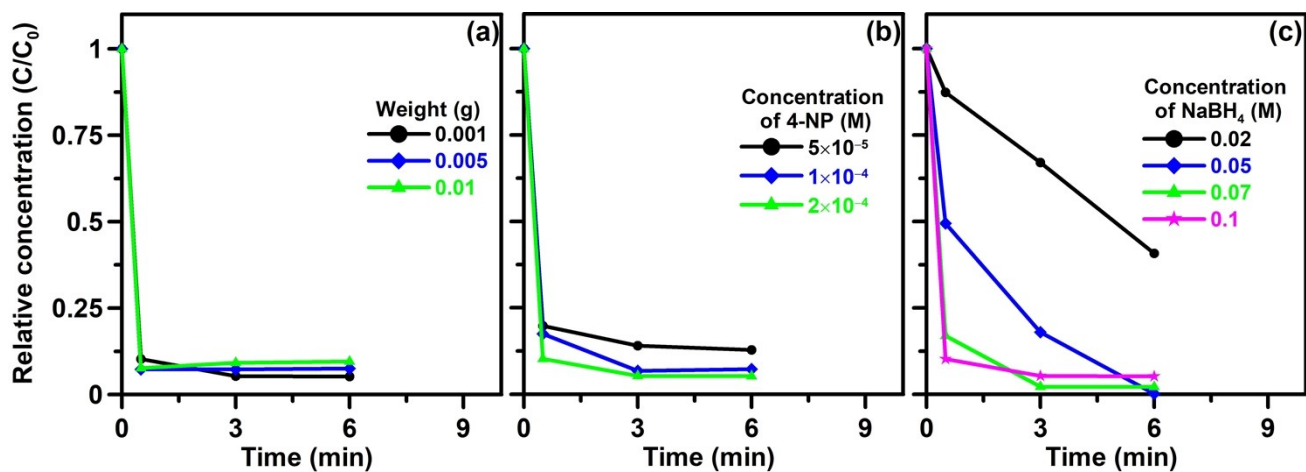

**Figure S4** Photoassisted reduction of 4-NP to 4-AP under simulated solar irradiation using 10Cu/FeO under different experimental conditions: (a) reaction mixture contained 0.1 M of  $\text{NaBH}_4$ ,  $2 \times 10^{-4}$  M of 4-NP, and different concentrations of 10Cu/FeO; (b) reaction mixture contained 0.1 M of  $\text{NaBH}_4$ , 0.001 g of 10Cu/FeO and different concentrations of 4-NP; (c) reaction mixture contained  $2 \times 10^{-4}$  M of 4-NP, 0.001 g of 10Cu/FeO and different concentrations of  $\text{NaBH}_4$ .

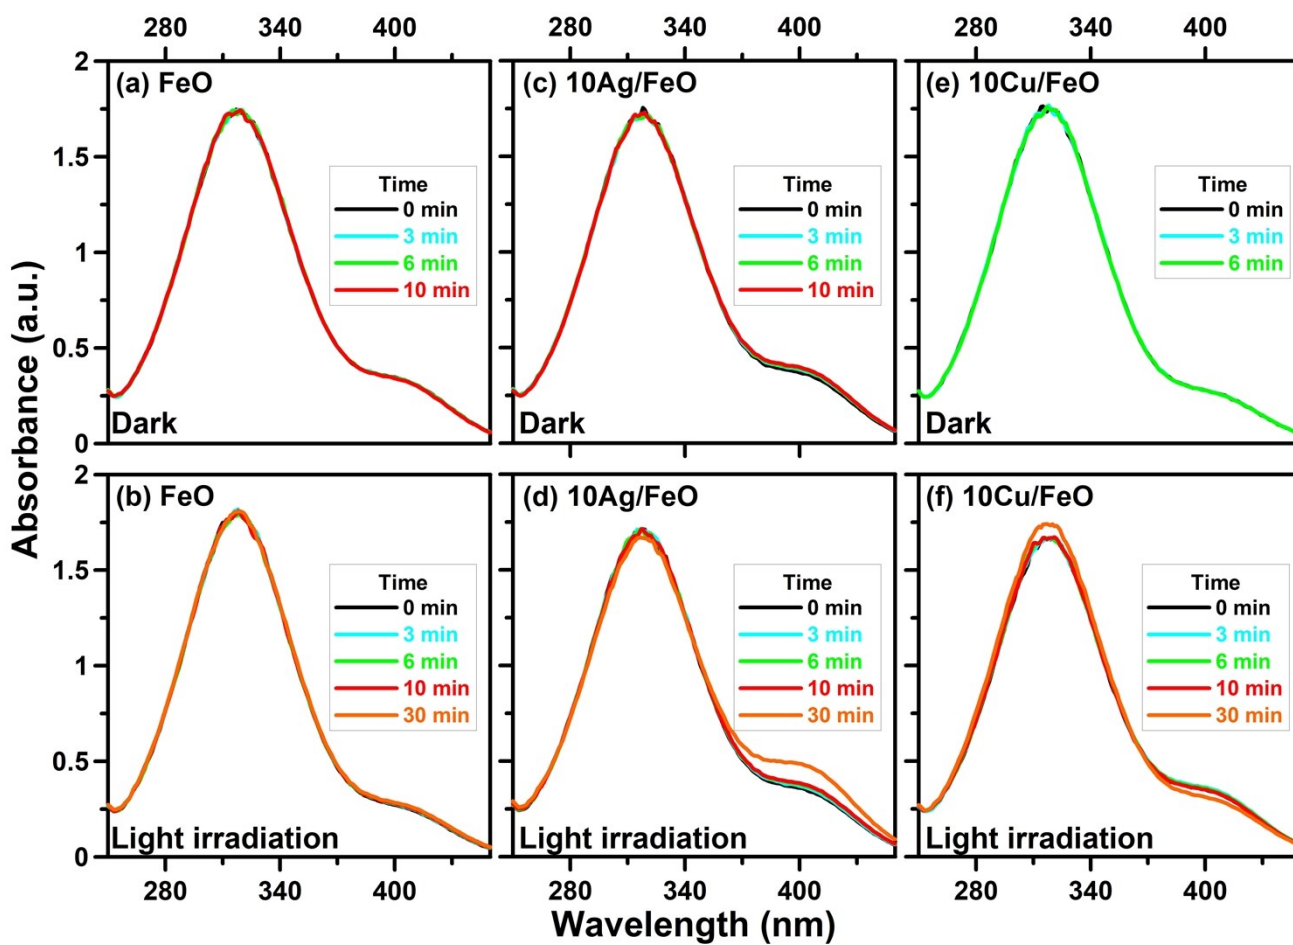

**Figure S5** Photoassisted reduction of 4-NP to 4-AP conversion FeO, 10Ag/FeO, and 10Cu/FeO in the dark or under simulated solar irradiation in the absence of  $\text{NaBH}_4$ .

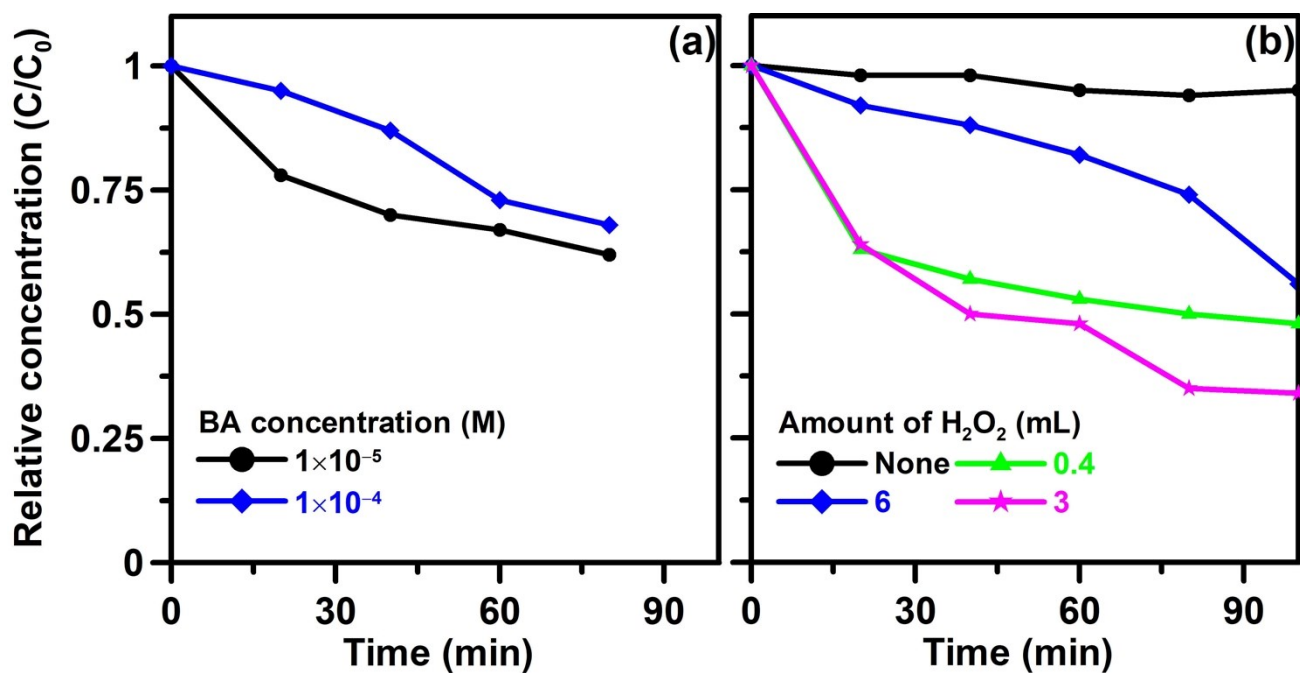

**Figure S6** Photoassisted oxidation of BA over 10Ag/FeO under simulated solar light irradiation and different experimental conditions: (a) BA concentrations of  $1 \times 10^{-5}$  M, and  $1 \times 10^{-4}$  M (100 mL) and 1 mL of  $H_2O_2$ ; (b) BA concentration of  $1 \times 10^{-5}$  M (100 mL) and different amounts of  $H_2O_2$  (0, 0.4, 3, and 6 mL).

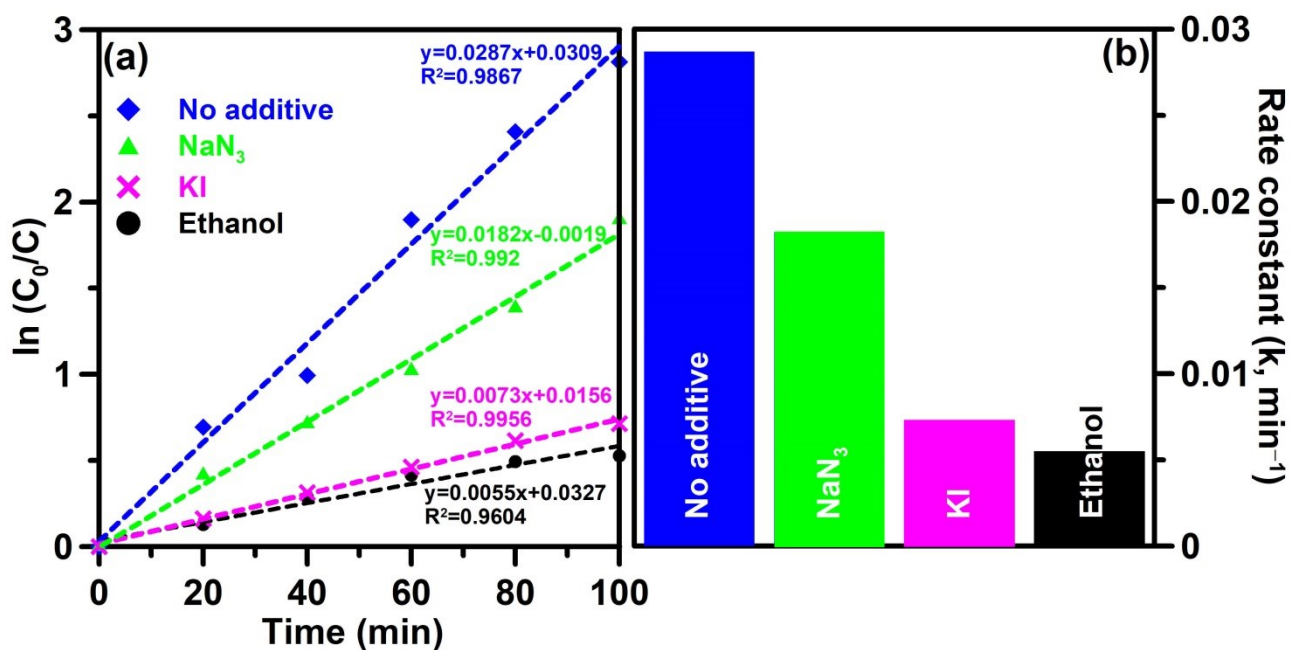

**Figure S7** (a) Pseudo-first-order reaction kinetic plots of photoassisted oxidation of BA ( $1 \times 10^{-5}$  M, 100 mL) using 0.03 g of 10Ag/FeO and  $\text{H}_2\text{O}_2$  (3 mL) and  $\text{NaN}_3$  (0.015 g), KI (0.04 g), or ethanol (10 mL) as scavengers. (b) Rate constants obtained from the pseudo-first-order reaction kinetic plot in (a).



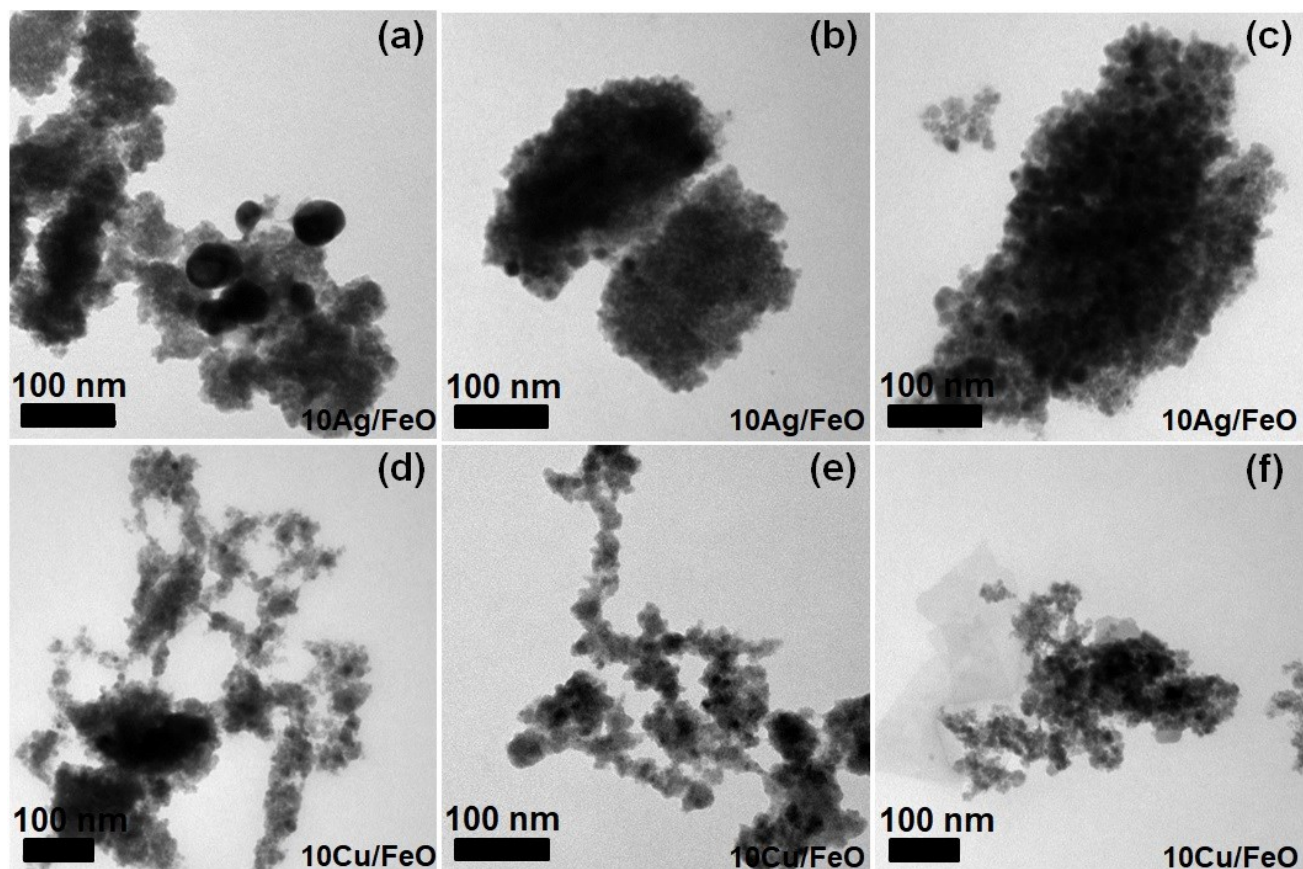

**Figure S8** TEM images of (a)–(c) 10Ag/FeO and (d)–(f) 10Cu/FeO. (a) and (d) before the reaction, (b) and (e) after the oxidation of BA, and (c) and (f) after the reduction of 4-NP.

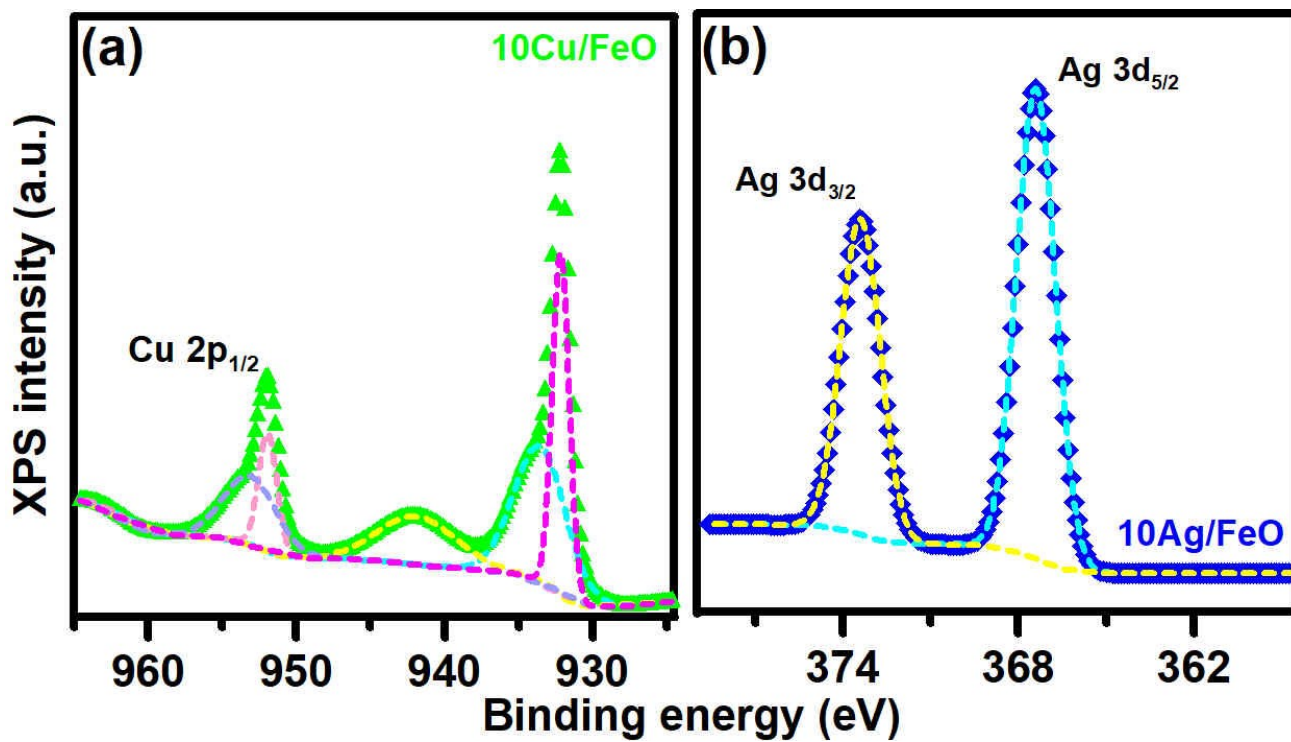

**Figure S9** High-resolution (a) Cu 2*p* and (b) Ag 3*d* XPS profiles of 10Cu/FeO and 10Ag/FeO samples after the photoassisted reaction.
